# Supplementary material for: Orally active bivalent VHH construct prevents proliferation of F4+ enterotoxigenic Escherichia coli in weaned piglets
Source: PubMed Central journal article supplement — iScience. 2022 Mar 1;25(4):104003. doi: 10.1016/j.isci.2022.104003 (PMC8931358; doi:10.1016/j.isci.2022.104003), 2022-03-01
Supplement: mmc1.pdf [file mmc1.pdf]

**Supplemental information**

**Orally active bivalent V<sub>H</sub>H construct prevents**

**proliferation of F4<sup>+</sup> enterotoxigenic**

***Escherichia coli* in weaned piglets**

**Berthe Katrine Fiil, Sandra Wingard Thrane, Michael Pichler, Tiia Kittilä, Line Ledsgaard, Shirin Ahmadi, Grith Miriam Maigaard Hermansen, Lars Jelsbak, Charlotte Lauridsen, Susanne Brix, and Andreas Hougaard Laustsen**

## Supplementary Information

Fig. S1.

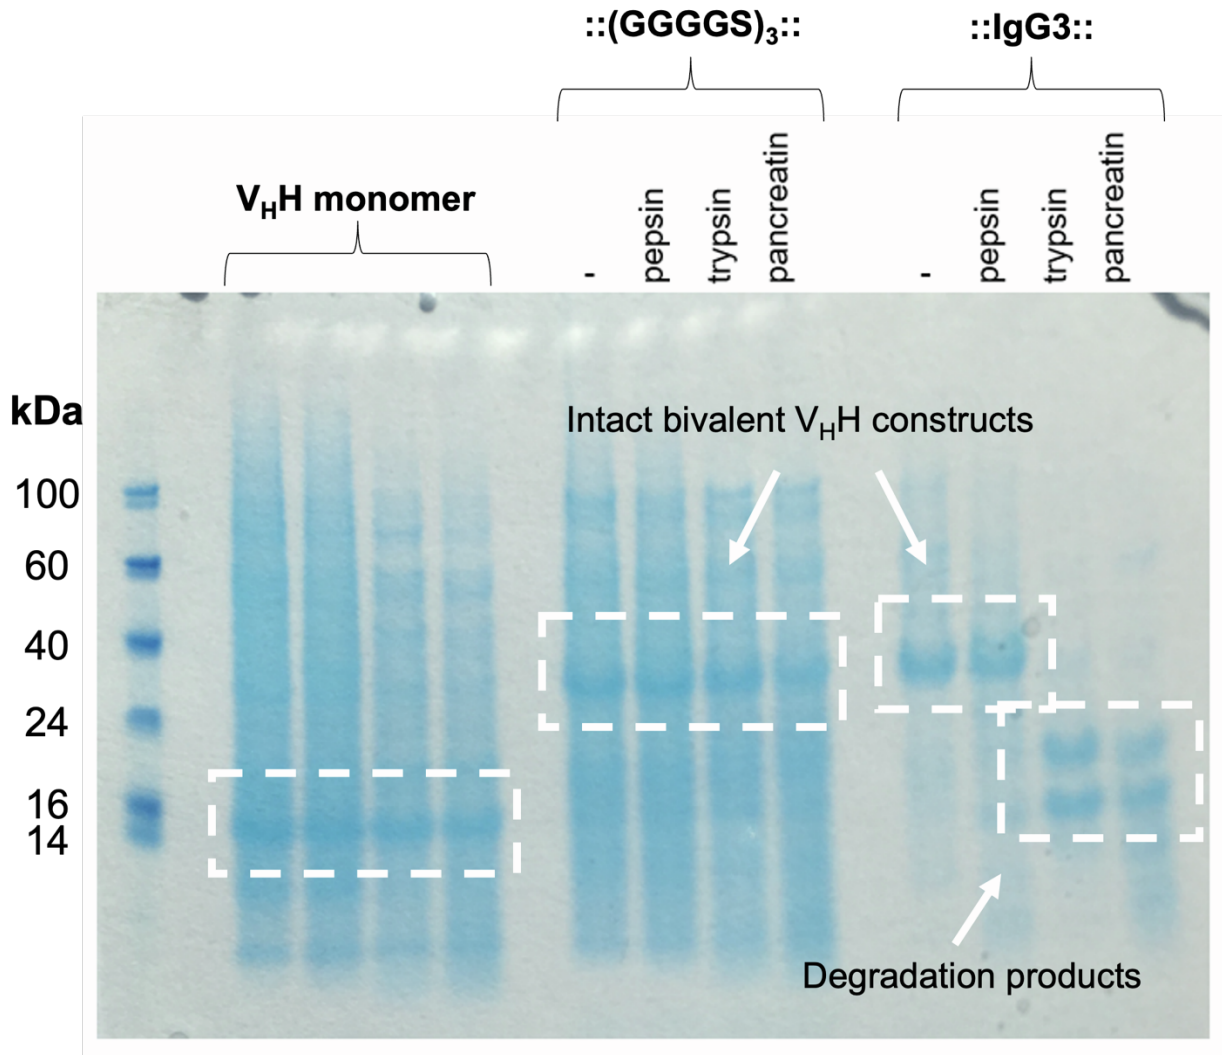

**Supplementary Figure S1. The bivalent V<sub>H</sub>H construct comprising a glycine-serine linker shows increased proteolytic stability compared to a similar bivalent V<sub>H</sub>H construct comprising an IgG3 linker. Related to Figure 1.** After incubation with pepsin at pH 3, trypsin at pH 8, or pancreatin at pH 8, the bivalent V<sub>H</sub>H construct based on a glycine-serine linker (::GGGGS<sub>3</sub>::) remained stable, while the bivalent V<sub>H</sub>H construct based on an IgG3 linker (::IgG3::) was degraded to monomers after incubation with trypsin or pancreatin.

**Fig. S2.**

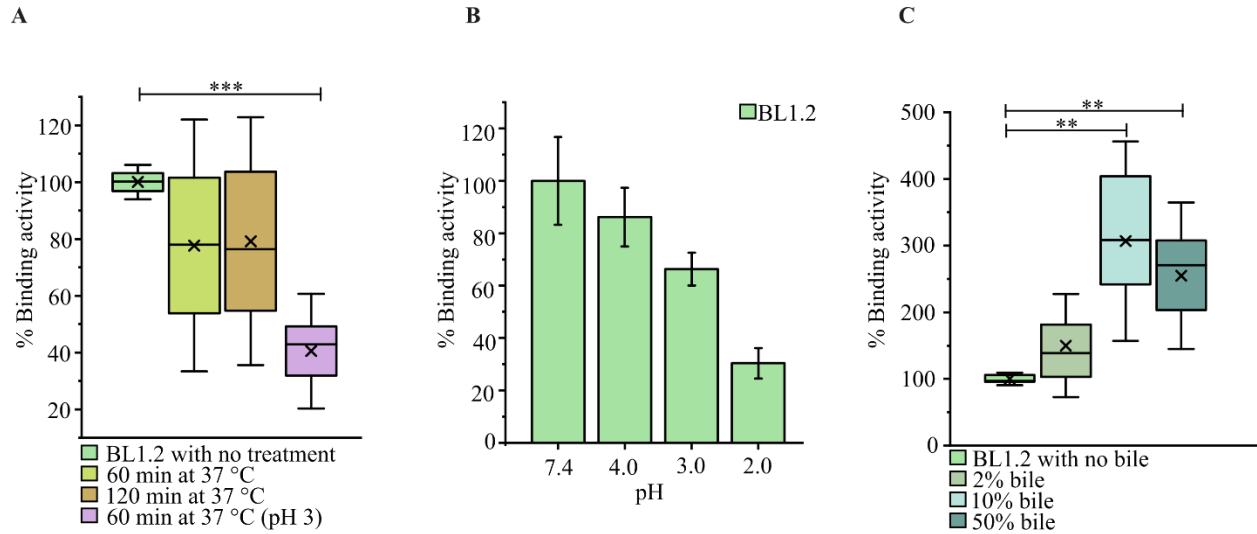

**Supplementary Figure S2. The bivalent BL1.2 V<sub>H</sub>H construct preserves stable binding to F4<sup>+</sup> ETEC upon exposure to different conditions present in the pig intestine. Related to Figure 2.** A) Remaining binding activity of the bivalent BL1.2 V<sub>H</sub>H construct to F4<sup>+</sup> ETEC upon pre-incubation in freshly collected pig gastric juice for up to two hours. B) Remaining binding activity of BL1.2 to F4<sup>+</sup> ETEC after pre-incubation at different pH (adjusted with HCl to mimic pig gastric acid) for 1 h at 37°C. Data represents mean ± SD. C) Binding of BL1.2 to F4<sup>+</sup> ETEC in the presence of freshly collected pig bile at different concentrations. The level of BL1.2 binding to F4<sup>+</sup> ETEC (A-C) was determined indirectly; product (pretreated or not) was used to coat the wells at a concentration within the dynamic range of the assay, F4<sup>+</sup> ETEC was added to saturating levels, and BL1.1-FLAG was used to determine the level of bound F4<sup>+</sup> ETEC. ELISA-based binding analyses (A-C) were performed in at least three independent biological replicates (n ≥ 3). For binding activities presented in A and C, the median is shown as a line, mean with an X, and whiskers show the standard deviation (SD). An one-way Anova was used to determine statistical significance between the individual groups and a Tukey's range test was applied *post hoc* to identify significant different groups; Tukey's test: \*, *p* < 0.05 \*\*\*, *p* < 0.001.

**Fig. S3.**

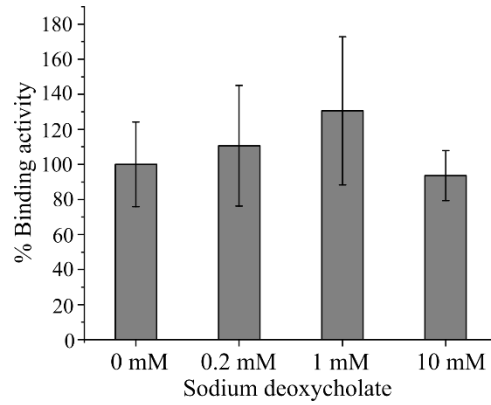

**Supplementary Figure S3. Effects of sodium deoxycholate on binding of the BL1.2 construct to F4<sup>+</sup> ETEC. Related to Figure 2.** Binding of BL1.2 to F4<sup>+</sup> ETEC in the presence of sodium deoxycholate at different concentrations. The level of BL1.2 binding to F4<sup>+</sup> ETEC was determined by indirect ELISA, where BL1.2 was used to coat the wells, F4<sup>+</sup> ETEC was added to saturating levels in the presence of sodium deoxycholate, and BL1.1-FLAG was used to determine the level of bound F4<sup>+</sup> ETEC. Binding assays were performed as independent biological triplicates and data represent mean ± SD.

Fig. S4.

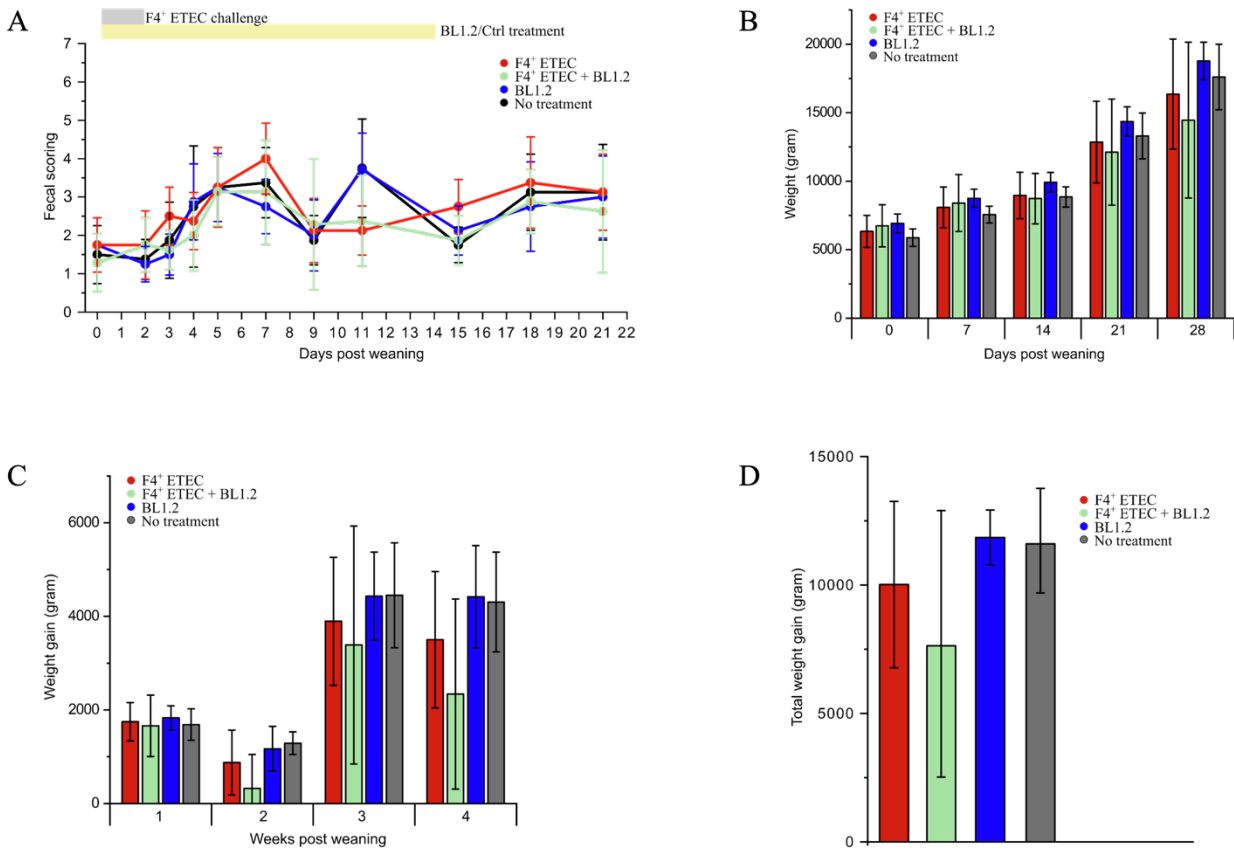

**Supplementary Figure S4. Data on effect of F4<sup>+</sup> ETEC infection in piglets. Related to Figure 4.** A) Fecal scoring of piglets in individual treatment groups over a period of 21 days post weaning (Bristol stool scale: 1 = hard, dry and cloddy, 2 = firm, 3 = soft with shape, 4 = soft and liquid, 5 = watery and dark, 6 = watery and yellow, 7 = foamy and yellow). B) Body weight of piglets in individual treatment groups over a period of 28 days post-weaning. C) Weekly weight gain of piglets in individual treatment groups over a period of 4 weeks post-weaning. D) Total weight gain of piglets in individual treatment groups over a period of 28 days post-weaning. (A-D) Piglets in treatment groups (n = 8) “F4<sup>+</sup> ETEC” and “F4<sup>+</sup> ETEC + BL1.2” were challenged by gavage with  $1-1.7 \times 10^9$  F4<sup>+</sup> ETEC at day one and two post-weaning. The non-challenged groups were gavaged with sodium bicarbonate. BL1.2 or the control protein, chicken egg albumin (Ctrl), which were administered to the “F4<sup>+</sup> ETEC” and “no treatment” groups, respectively, were provided from day 1 to 14 via oral gavage. (A-D) Data represents mean  $\pm$  SD. (A-D) Presented data from the individual treatment groups are not significantly different (ANOVA,  $p < 0.05$ ).

**Supplementary Table S1.** Genome analysis of the AUF4 and AUF18 porcine ETEC strains. Related to STAR Methods.

| Name  | Genome size (bp) | CDS   | Contigs | N50     | %GC   | Serogroup | MLST  | Adhesins                                  | Enterotoxins                          |
|-------|------------------|-------|---------|---------|-------|-----------|-------|-------------------------------------------|---------------------------------------|
| AUF4  | 5,370,933        | 5,211 | 220     | 113,087 | 50.62 | O149:H10  | ST100 | <i>faeG, csgG, eaeH, ecpA</i>             | <i>east1, eltB, estB</i>              |
| AUF18 | 5,576,275        | 5,420 | 277     | 101,135 | 50.42 | O138:H14  | ST42  | <i>fedF, fimH, csgG, eaeH, sfmA, ecpA</i> | <i>east1, stx2e, hlyE, eltB, estB</i> |

**Supplementary Table S2.** Mass spectrometry-based identification of BL1.1 from the acid eluate. Related to Figure 1. Table summarizes identified peptides of BL1.1 and search engine retrieved quality scores thereof. Identification was based on a coverage of 85%, 129 reads, and 14 unique peptides.

| Conf | Sequence                         | Modifications                             | PSMs | Master Protein Accessions | Missed cleavages | Theo. MH+ [Da] | Confidence (by Search Engine): Sequest HT | XCorr (by Search Engine): Sequest HT |
|------|----------------------------------|-------------------------------------------|------|---------------------------|------------------|----------------|-------------------------------------------|--------------------------------------|
| High | DNAKNTVYLQMNSLKPEDTAVYYCAAGR     | 1xCarbamidomethyl [C24]                   | 1    | BL1.1                     | 1                | 3192.50886     | High                                      | 7.52                                 |
| High | NTVYLQMNSLKPEDTAVYYCAAGR         | 1xCarbamidomethyl [C20]; 1xOxidation [M7] | 10   | BL1.1                     | 0                | 2780.30183     | High                                      | 6.27                                 |
| High | NTVYLQMNSLKPEDTAVYYCAAGR         | 1xCarbamidomethyl [C20]                   | 6    | BL1.1                     | 0                | 2764.30691     | High                                      | 7.54                                 |
| High | GRFTISRDNAL                      |                                           | 8    | BL1.1                     | 2                | 1264.67566     | High                                      | 3.57                                 |
| High | GRFTISR                          |                                           | 1    | BL1.1                     | 1                | 836.47371      | High                                      | 2.13                                 |
| High | GGGSSYYADSVKGRFTISR              |                                           | 3    | BL1.1                     | 2                | 2007.98828     | High                                      | 3.9                                  |
| High | GGGSSYYADSVKGR                   |                                           | 3    | BL1.1                     | 1                | 1403.65498     | High                                      | 4.41                                 |
| High | GGGSSYYADSVK                     |                                           | 4    | BL1.1                     | 0                | 1190.53241     | High                                      | 3.36                                 |
| High | GAPSDTGRPDEYDYWGQGTQVTVSS        |                                           | 15   | BL1.1                     | 0                | 2673.16994     | High                                      | 6.56                                 |
| High | FTISRDNKNTVYLQMNSLKPEDTAVYYCAAGR | 1xCarbamidomethyl [C29] 1xOxidation [M16] | 2    | BL1.1                     | 2                | 3812.83707     | High                                      | 4.39                                 |
| High | FTISRDNKNTVYLQMNSLKPEDTAVYYCAAGR | 1xCarbamidomethyl [C29]                   | 4    | BL1.1                     | 2                | 3796.84215     | High                                      | 7.89                                 |
| High | FTISRDNAL                        |                                           | 2    | BL1.1                     | 1                | 1051.55308     | High                                      | 2.59                                 |
| High | EREFVATVSRGGGSSYYADSVK           |                                           | 21   | BL1.1                     | 2                | 2365.14188     | High                                      | 6.07                                 |
| High | EREFVATVSR                       |                                           | 6    | BL1.1                     | 1                | 1193.62731     | High                                      | 3.67                                 |
| High | EFVATVSRGGGSSYYADSVKGR           |                                           | 3    | BL1.1                     | 2                | 2293.12075     | High                                      | 4.42                                 |
| High | EFVATVSRGGGSSYYADSVK             |                                           | 5    | BL1.1                     | 1                | 2079.99817     | High                                      | 4.57                                 |
| High | EFVATVSR                         |                                           | 2    | BL1.1                     | 0                | 908.48361      | High                                      | 2.09                                 |
| High | QAPGKEREFVATVSR                  |                                           | 5    | BL1.1                     | 2                | 1674.89219     | High                                      | 3.83                                 |
| High | QVQLQESGGGLVQPGGSLR              |                                           | 28   | BL1.1                     | 0                | 1910.00901     | High                                      | 5.6                                  |

**PSM:** peptide-spectrum match. **Theo. MH+:** Theoretical mass of protonated peptides.

**Supplementary Table S3:** Source data of F4<sup>+</sup> ETEC challenge in post-weaning piglets. Related to Figure 4.

| Treatment group              | Number of piglets | F4 <sup>+</sup> ETEC challenge | BL1.2 administration | Time point in day (D) / Number of infected piglets |    |    |     |    |    |    |      |     |     |     |  |
|------------------------------|-------------------|--------------------------------|----------------------|----------------------------------------------------|----|----|-----|----|----|----|------|-----|-----|-----|--|
|                              |                   |                                |                      | D0                                                 | D2 | D3 | D4  | D5 | D7 | D9 | D11  | D15 | D18 | D21 |  |
| F4 <sup>+</sup> ETEC         | 8                 | Yes                            | No                   | 0                                                  | 4* | 5  | 6*  | 7  | 8  | 6* | 3*** | 1   | 0   | 2   |  |
| F4 <sup>+</sup> ETEC + BL1.2 | 8                 | Yes                            | Yes                  | 0                                                  | 2* | 5  | 6** | 2* | 1  | 1* | 0    | 2*  | 0   | 3   |  |
| BL1.2                        | 8                 | No                             | Yes                  | 0                                                  | 0  | 0  | 0   | 0  | 0  | 0  | 0    | 0   | 0   | 0   |  |
| No treatment                 | 8                 | No                             | No                   | 0                                                  | 0  | 0  | 0   | 0  | 0  | 0  | 0    | 0   | 0   | 0   |  |

\*) 1 pig with one positive colony. \*\*) 2 pigs with 2 positive colonies; 1 pig with 1 positive colony. \*\*\*) 2 pigs with 1 positive colony; 1 pig with 2 positive colonies. When no asterisks are present, 5/5 colonies tested per pig were positive.



**Supplementary Table 4.** Summary of blood sample analysis from F4+ ETEC challenged post-weaning piglets. Related to Figure 4.

|                                       | BL2.1                      |                         | Control                    |                         |
|---------------------------------------|----------------------------|-------------------------|----------------------------|-------------------------|
|                                       | No F4 <sup>+</sup><br>ETEC | F4 <sup>+</sup><br>ETEC | No F4 <sup>+</sup><br>ETEC | F4 <sup>+</sup><br>ETEC |
| Red blood cells (10 <sup>12</sup> /L) | 6.58                       | 6.45                    | 6.14                       | 6.53                    |
| Hematocrit (%)                        | 39.2                       | 38.2                    | 38.2                       | 38.2                    |
| Hemoglobin (mmol/L)                   | 11.7                       | 11.2                    | 11.6                       | 11.6                    |
| Leukocytes (10 <sup>9</sup> /L)       | 14.0                       | 14.9                    | 14.5                       | 14.0                    |
| Lymphocytes (%)                       | 54.4                       | 60.7                    | 57.1                       | 52.5                    |
| Neutrophils (%)                       | 39.8                       | 32.8                    | 37.3                       | 41.9                    |
| Monocytes (%)                         | 4.58                       | 5.25                    | 4.39                       | 4.20                    |

Data are means of 8 piglets per groups.

**Supplementary Table 5.** Summary of previously described ETEC adhesin and toxin genes, which were used in this study to verify and outline virulence gene profiles of the *de novo* assembly of AUF4 and AUF18 via BLASTn. Related to STAR Methods.

|                     | Gene         | Accession no. | Gene product                                                     | Size (bp) |
|---------------------|--------------|---------------|------------------------------------------------------------------|-----------|
|                     | <i>faeG</i>  | M29375        | F4 fimbrial tip adhesin                                          | 840       |
|                     | <i>fedF</i>  | AY970782      | F18 fimbrial tip adhesin                                         | 918       |
|                     | <i>fimH</i>  | X05672        | Type 1 fimbriae, D-mannose-specific adhesin                      | 2050      |
| <b>Adhesins</b>     | <i>csgG</i>  | EU902647      | Facilitator of fibronectin-binding curli assembly                | 834       |
|                     | <i>eaeH</i>  | DQ109813      | Highly conserved adhesin                                         | 4257      |
|                     | <i>sfmA</i>  | AS153589      | Fimbrial-like adhesin                                            | 573       |
|                     | <i>ecpA</i>  | ACI29343      | <i>E. coli</i> common pilus                                      | 588       |
|                     | <i>east1</i> | AB042002      | Enteroaggregative <i>E. coli</i> heat-stable enterotoxin (EAST1) | 117       |
|                     | <i>stx2e</i> | AJ313016      | Shiga like toxin type 2e (stx2e)                                 | 1509      |
| <b>Enterotoxins</b> | <i>hlyE</i>  | AB646137      | Hemolysin E (HlyE)                                               | 1254      |
|                     | <i>eltB</i>  | M17873        | Heat-labile enterotoxin B subunit (LT)                           | 604       |
|                     | <i>estA</i>  | M58746        | Heat-stable enterotoxin a (STa)                                  | 667       |
|                     | <i>estB</i>  | P22542        | Heat-stable enterotoxin b (STb)                                  | 216       |
